# Supplementary material for: Novel Discoveries of Anterior Segment Parameters in Fellow Eyes of Acute Primary Angle Closure and Chronic Primary Angle Closure Glaucoma
Source: PubMed Central journal article supplement — Invest Ophthalmol Vis Sci. 2021 Nov 3;62(14):6. doi: 10.1167/iovs.62.14.6 (PMC8572512; doi:10.1167/iovs.62.14.6), 2021-11-03
Supplement: iovs-62-14-6_s001.pdf [file iovs-62-14-6_s001.pdf]

Table S1. Intra-observer and Inter-observer Intra-class Coefficients of the Ultrasound Biomicroscopy Parameters.

| Parameters | Intra-observer | Inter-observer |
|------------|----------------|----------------|
| PD         | 0.997          | 0.989          |
| LV         | 0.977          | 0.913          |
| ACW        | 0.949          | 0.906          |
| ACD        | 0.996          | 0.995          |
| Iris area  | 0.981          | 0.901          |
| IT 750     | 0.974          | 0.949          |
| IT 2000    | 0.997          | 0.967          |
| AOD 500    | 0.970          | 0.824          |
| AOD 750    | 0.994          | 0.872          |
| TISA 500   | 0.922          | 0.934          |
| TISA 750   | 0.961          | 0.986          |
| TIA 500    | 0.975          | 0.944          |
| TIA 750    | 0.982          | 0.969          |
| CPA        | 0.997          | 0.969          |
| TCA        | 0.904          | 0.903          |

F-APAC, fellow eyes of acute primary angle closure; F-CPACG, fellow eyes of chronic primary angle closure glaucoma; PD, pupil diameter; LV, lens vault; ACW, anterior chamber width; ACD, anterior chamber depth; IT 750/2000, iris thickness at 750/2000  $\mu\text{m}$  from the scleral spur; AOD 500/750, angle-opening distance at 500/750  $\mu\text{m}$  from the scleral spur; TISA 500/750, trabecular-iris space area at 500/750

---

$\mu\text{m}$  from the scleral spur; TIA 500/750, trabecular iris angle at 500/750  $\mu\text{m}$  from the scleral spur; CPA, ciliary process area; TCA, trabecular-ciliary angle.
